# Supplementary material for: Complexation and thermodynamics of Cm(iii) at high temperatures: the formation of [Cm(SO4)n]3−2n(n = 1, 2, 3) complexes at T = 25 to 200 °C
Source: Royal Society of Chemistry journal article supplement (doi:10.1039/c2dt31529g), 2012-10-22
Supplement: c2dt31529g.pdf [file c2dt31529g.pdf]

## Supplementary Informations

### 1. Calculation of the unprotonated sulphate concentration ( $[\text{SO}_4^{2-}]_{\text{eq}}$ )

The  $[\text{SO}_4^{2-}]_{\text{eq}}$  depends on the twofold protonation of the sulphate ion and the resulting equilibria between  $\text{H}_2\text{SO}_4$ ,  $\text{HSO}_4^-$  and  $\text{SO}_4^{2-}$ . The  $\text{p}K_a^0$  of sulfuric acid increases from -3 to -0.1 in the studied temperature range.<sup>1</sup> Thus,  $\text{H}_2\text{SO}_4$  can be neglected under the present experimental conditions, and the  $\text{SO}_4^{2-}$  concentration is determined by the following equilibrium.

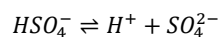

In order to calculate  $[\text{SO}_4^{2-}]_{\text{eq}}$  the following assumptions are made:

- 1.)  $\text{Na}_2\text{SO}_4$  and  $\text{NaClO}_4$  are completely dissociated in aqueous solution
- 2.) The total sulphate concentration is described by

$$[\text{SO}_4^{2-}]_{\text{total}} = [\text{SO}_4^{2-}]_{\text{eq}} + [\text{HSO}_4^-]_{\text{eq}} \quad \text{eq 1}$$

- 3.) The total proton concentration is described by

$$[\text{H}^+]_{\text{total}} = [\text{H}^+]_{\text{eq}} + [\text{HSO}_4^-]_{\text{eq}} \quad \text{eq 2}$$

Hereby, the total proton concentration equals the amount of added perchloric acid. The protons generated from the autoprotolysis of water can be neglected under the present experimental conditions.<sup>2</sup> The  $[\text{SO}_4^{2-}]_{\text{eq}}$  is then calculated according to equation 3.

$$[\text{SO}_4^{2-}]_{\text{eq}} = \frac{-C + \sqrt{C^2 + 4K'_{\text{HSO}_4^-}(T) \cdot [\text{SO}_4^{2-}]_{\text{total}}}}{2} \quad \text{eq 3}$$

with

$$C = [\text{H}^+]_{\text{total}} - [\text{SO}_4^{2-}]_{\text{total}} + K'_{\text{HSO}_4^-}(T) \quad \text{eq 4}$$

The values of  $\log K^0(\text{HSO}_4^-)(T)$  are taken from Dickson et al.<sup>3</sup> The conditional  $\log K'(\text{HSO}_4^-)(T)$  values for the different ionic strengths ( $\text{NaClO}_4$ ) are calculated according to the SIT. For this, temperature independent ion-ion interaction coefficients are used ( $\epsilon(\text{HSO}_4^-, \text{Na}^+) = -0.01 \pm 0.02$ ;  $\epsilon(\text{SO}_4^{2-}, \text{Na}^+) = -0.12 \pm 0.06$ ;  $\epsilon(\text{H}^+, \text{ClO}_4^-) = 0.14 \pm 0.02$ ). The so calculated free sulphate concentration at two different  $[\text{SO}_4^{2-}]_{\text{total}}$  is displayed as a function of the temperature in figure 1. The results show a general decrease of  $[\text{SO}_4^{2-}]_{\text{eq}}$  with increasing temperature.

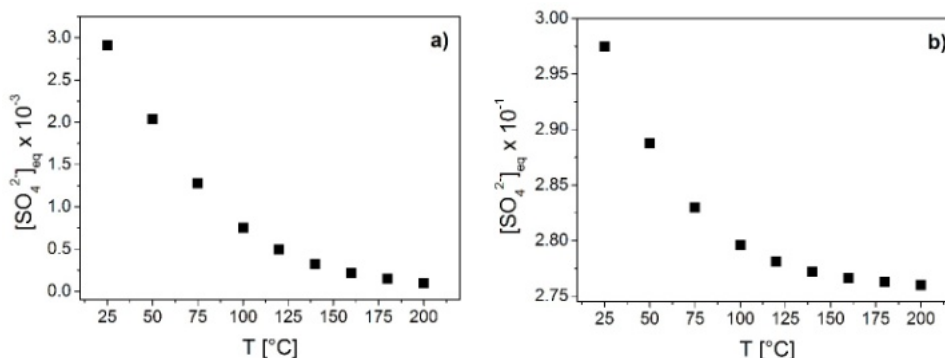

**Fig. 1**  $[\text{SO}_4^{2-}]_{\text{eq}}$  as a function of the temperature at a)  $[\text{SO}_4^{2-}]_{\text{total}} = 5.5 \cdot 10^{-3}$  m and b)  $[\text{SO}_4^{2-}]_{\text{total}} = 3.6 \cdot 10^{-1}$  m ( $[\text{HClO}_4]_{\text{total}} = 8.93 \cdot 10^{-2}$  mol/kg  $\text{H}_2\text{O}$ )

## 2. Application of the specific ion interaction theory (SIT)

According to the SIT, the conditional stability constants are related to the thermodynamic  $\log K_n^0(T)$  values by equation 5.

$$\log K_n^0(T) = \log K'_n(T) - \Delta z^2 D(T) + \Delta \varepsilon_n(T) \cdot I_m \quad \text{eq 5}$$

Hereby,  $I_m$  is the molal ionic strength and  $D(T)$  is the temperature dependent Debye-Hückel term:  $D(T) = A(T)(I_m)^{0.5} / (1 + Ba_j(T) \cdot (I_m)^{0.5})$ . The Debye-Hückel parameters  $A(T)$  and  $Ba_j(T)$  are given in the NEA-TDB as a function of the temperature.<sup>4</sup> For the formation of the  $[\text{Cm}(\text{SO}_4)_n]^{3-2n}$  ( $n = 1, 2, 3$ ) complexes the values of  $\Delta z^2$  are  $\Delta z^2 = -12$  for  $n = 1$ ,  $\Delta z^2 = -4$  for  $n = 2$  and  $\Delta z^2 = -4$  for 3. The thermodynamic  $\log K_n^0(T)$  and  $\Delta \varepsilon_n(T)$  values are obtained from the conditional  $\log K'_n(T)$  values at  $I_m = 1.0 - 4.0$  m by linear regression according to equation 5. For each temperature  $\log K'_n(T) - \Delta z^2 \cdot D(T)$  is plotted versus  $I_m$  (SIT plots).

### 3. Experimentally determined speciations of the studied samples

#### 3.1 Samples at constant ionic strength

| $[\text{SO}_4^{2-}]_{\text{total}} = 6 \cdot 10^{-3} \text{ mol/kg H}_2\text{O}, I_m = 2.0 \text{ (NaClO}_4\text{)}$ |                        |                                  |                                    |                                       |
|----------------------------------------------------------------------------------------------------------------------|------------------------|----------------------------------|------------------------------------|---------------------------------------|
| T [°C]                                                                                                               | $\chi \text{ Cm}^{3+}$ | $\chi \text{ Cm(SO}_4\text{)}^+$ | $\chi \text{ Cm(SO}_4\text{)}_2^-$ | $\chi \text{ Cm(SO}_4\text{)}_3^{3-}$ |
| 25                                                                                                                   | 0.939                  | 0.068                            | 0.005                              | 0.002                                 |
| 50                                                                                                                   | 0.939                  | 0.054                            | 0.001                              | 0.006                                 |
| 75                                                                                                                   | 0.895                  | 0.101                            | 0.007                              | 0.002                                 |
| 100                                                                                                                  | 0.881                  | 0.114                            | 0.006                              | 0.001                                 |
| 120                                                                                                                  | 0.855                  | 0.146                            | 0.007                              | 0.003                                 |
| 140                                                                                                                  | 0.830                  | 0.148                            | 0.013                              | 0.005                                 |
| 160                                                                                                                  | 0.818                  | 0.163                            | 0.013                              | 0.004                                 |
| 180                                                                                                                  | 0.795                  | 0.174                            | 0.012                              | 0.005                                 |
| 200                                                                                                                  | 0.800                  | 0.169                            | 0.024                              | 0.004                                 |

| $[\text{SO}_4^{2-}]_{\text{total}} = 1.5 \cdot 10^{-2} \text{ mol/kg H}_2\text{O}, I_m = 2.0 \text{ (NaClO}_4\text{)}$ |                        |                                  |                                    |                                       |
|------------------------------------------------------------------------------------------------------------------------|------------------------|----------------------------------|------------------------------------|---------------------------------------|
| T [°C]                                                                                                                 | $\chi \text{ Cm}^{3+}$ | $\chi \text{ Cm(SO}_4\text{)}^+$ | $\chi \text{ Cm(SO}_4\text{)}_2^-$ | $\chi \text{ Cm(SO}_4\text{)}_3^{3-}$ |
| 25                                                                                                                     | 0.868                  | 0.130                            | 0.008                              | 0.002                                 |
| 50                                                                                                                     | 0.899                  | 0.091                            | 0.002                              | 0.000                                 |
| 75                                                                                                                     | 0.771                  | 0.221                            | 0.012                              | 0.000                                 |
| 100                                                                                                                    | 0.696                  | 0.295                            | 0.015                              | 0.000                                 |
| 120                                                                                                                    | 0.637                  | 0.357                            | 0.011                              | 0.003                                 |
| 140                                                                                                                    | 0.529                  | 0.416                            | 0.065                              | 0.005                                 |
| 160                                                                                                                    | 0.502                  | 0.464                            | 0.043                              | 0.004                                 |
| 180                                                                                                                    | 0.478                  | 0.475                            | 0.005                              | 0.005                                 |
| 200                                                                                                                    | 0.448                  | 0.484                            | 0.079                              | 0.007                                 |

| $[\text{SO}_4^{2-}]_{\text{total}} = 3.1 \cdot 10^{-2} \text{ mol/kg H}_2\text{O}, I_m = 2.0 \text{ (NaClO}_4\text{)}$ |                        |                                  |                                    |                                       |
|------------------------------------------------------------------------------------------------------------------------|------------------------|----------------------------------|------------------------------------|---------------------------------------|
| T [°C]                                                                                                                 | $\chi \text{ Cm}^{3+}$ | $\chi \text{ Cm(SO}_4\text{)}^+$ | $\chi \text{ Cm(SO}_4\text{)}_2^-$ | $\chi \text{ Cm(SO}_4\text{)}_3^{3-}$ |
| 25                                                                                                                     | 0.826                  | 0.186                            | 0.018                              | 0.002                                 |
| 50                                                                                                                     | 0.753                  | 0.191                            | 0.020                              | 0.016                                 |
| 75                                                                                                                     | 0.660                  | 0.248                            | 0.074                              | 0.016                                 |
| 100                                                                                                                    | 0.561                  | 0.327                            | 0.094                              | 0.016                                 |
| 120                                                                                                                    | 0.443                  | 0.438                            | 0.094                              | 0.016                                 |
| 140                                                                                                                    | 0.291                  | 0.541                            | 0.136                              | 0.016                                 |
| 160                                                                                                                    | 0.268                  | 0.541                            | 0.173                              | 0.016                                 |
| 180                                                                                                                    | 0.268                  | 0.499                            | 0.172                              | 0.011                                 |
| 200                                                                                                                    | 0.225                  | 0.509                            | 0.188                              | 0.044                                 |

| $[\text{SO}_4^{2-}]_{\text{total}} = 1.16 \cdot 10^{-1} \text{ mol/kg H}_2\text{O}, I_m = 2.0 \text{ (NaClO}_4\text{)}$ |                        |                                  |                                    |                                       |
|-------------------------------------------------------------------------------------------------------------------------|------------------------|----------------------------------|------------------------------------|---------------------------------------|
| T [°C]                                                                                                                  | $\chi \text{ Cm}^{3+}$ | $\chi \text{ Cm(SO}_4\text{)}^+$ | $\chi \text{ Cm(SO}_4\text{)}_2^-$ | $\chi \text{ Cm(SO}_4\text{)}_3^{3-}$ |
| 25                                                                                                                      | 0.519                  | 0.390                            | 0.120                              | 0.002                                 |
| 50                                                                                                                      | 0.359                  | 0.398                            | 0.144                              | 0.054                                 |
| 75                                                                                                                      | 0.114                  | 0.592                            | 0.288                              | 0.016                                 |
| 100                                                                                                                     | 0.007                  | 0.508                            | 0.439                              | 0.048                                 |
| 120                                                                                                                     | 0.000                  | 0.432                            | 0.524                              | 0.048                                 |
| 140                                                                                                                     | 0.000                  | 0.227                            | 0.728                              | 0.096                                 |
| 160                                                                                                                     | 0.000                  | 0.145                            | 0.654                              | 0.250                                 |
| 180                                                                                                                     | 0.000                  | 0.050                            | 0.532                              | 0.414                                 |
| 200                                                                                                                     | 0.000                  | 0.025                            | 0.558                              | 0.456                                 |

| $[\text{SO}_4^{2-}]_{\text{total}} = 1.44 \cdot 10^{-1} \text{ mol/kg H}_2\text{O}, I_m = 2.0 \text{ (NaClO}_4\text{)}$ |                        |                                  |                                    |                                       |
|-------------------------------------------------------------------------------------------------------------------------|------------------------|----------------------------------|------------------------------------|---------------------------------------|
| T [°C]                                                                                                                  | $\chi \text{ Cm}^{3+}$ | $\chi \text{ Cm(SO}_4\text{)}^+$ | $\chi \text{ Cm(SO}_4\text{)}_2^-$ | $\chi \text{ Cm(SO}_4\text{)}_3^{3-}$ |
| 25                                                                                                                      | 0.402                  | 0.461                            | 0.120                              | 0.002                                 |
| 50                                                                                                                      | 0.293                  | 0.422                            | 0.190                              | 0.054                                 |
| 75                                                                                                                      | 0.032                  | 0.616                            | 0.343                              | 0.016                                 |
| 100                                                                                                                     | 0.002                  | 0.436                            | 0.514                              | 0.047                                 |
| 120                                                                                                                     | 0.000                  | 0.348                            | 0.556                              | 0.105                                 |
| 140                                                                                                                     | 0.000                  | 0.147                            | 0.728                              | 0.192                                 |
| 160                                                                                                                     | 0.000                  | 0.093                            | 0.622                              | 0.324                                 |
| 180                                                                                                                     | 0.000                  | 0.031                            | 0.432                              | 0.546                                 |
| 200                                                                                                                     | 0.000                  | 0.021                            | 0.329                              | 0.657                                 |

| $[\text{SO}_4^{2-}]_{\text{total}} = 2.12 \cdot 10^{-1} \text{ mol/kg H}_2\text{O}, I_m = 2.0 \text{ (NaClO}_4\text{)}$ |                        |                                  |                                    |                                       |
|-------------------------------------------------------------------------------------------------------------------------|------------------------|----------------------------------|------------------------------------|---------------------------------------|
| T [°C]                                                                                                                  | $\chi \text{ Cm}^{3+}$ | $\chi \text{ Cm(SO}_4\text{)}^+$ | $\chi \text{ Cm(SO}_4\text{)}_2^-$ | $\chi \text{ Cm(SO}_4\text{)}_3^{3-}$ |
| 25                                                                                                                      | 0.359                  | 0.437                            | 0.194                              | 0.002                                 |
| 50                                                                                                                      | 0.213                  | 0.442                            | 0.241                              | 0.054                                 |
| 75                                                                                                                      | 0.012                  | 0.534                            | 0.451                              | 0.032                                 |
| 100                                                                                                                     | 0.002                  | 0.287                            | 0.588                              | 0.118                                 |
| 120                                                                                                                     | 0.000                  | 0.218                            | 0.623                              | 0.151                                 |
| 140                                                                                                                     | 0.000                  | 0.029                            | 0.657                              | 0.348                                 |
| 160                                                                                                                     | 0.000                  | 0.056                            | 0.542                              | 0.422                                 |
| 180                                                                                                                     | 0.000                  | 0.016                            | 0.256                              | 0.715                                 |
| 200                                                                                                                     | 0.000                  | 0.013                            | 0.175                              | 0.815                                 |

| $[\text{SO}_4^{2-}]_{\text{total}} = 2.97 \cdot 10^{-1} \text{ mol/kg H}_2\text{O}, I_m = 2.0 \text{ (NaClO}_4\text{)}$ |                        |                                  |                                    |                                       |
|-------------------------------------------------------------------------------------------------------------------------|------------------------|----------------------------------|------------------------------------|---------------------------------------|
| T [°C]                                                                                                                  | $\chi \text{ Cm}^{3+}$ | $\chi \text{ Cm(SO}_4\text{)}^+$ | $\chi \text{ Cm(SO}_4\text{)}_2^-$ | $\chi \text{ Cm(SO}_4\text{)}_3^{3-}$ |
| 25                                                                                                                      | 0.324                  | 0.472                            | 0.194                              | 0.002                                 |
| 50                                                                                                                      | 0.213                  | 0.399                            | 0.319                              | 0.054                                 |
| 75                                                                                                                      | 0.012                  | 0.473                            | 0.508                              | 0.038                                 |
| 100                                                                                                                     | 0.002                  | 0.222                            | 0.662                              | 0.118                                 |
| 120                                                                                                                     | 0.000                  | 0.168                            | 0.635                              | 0.199                                 |
| 140                                                                                                                     | 0.000                  | 0.015                            | 0.624                              | 0.402                                 |
| 160                                                                                                                     | 0.000                  | 0.024                            | 0.494                              | 0.517                                 |
| 180                                                                                                                     | 0.000                  | 0.016                            | 0.201                              | 0.782                                 |
| 200                                                                                                                     | 0.000                  | 0.013                            | 0.103                              | 0.890                                 |

| $[\text{SO}_4^{2-}]_{\text{total}} = 3.65 \cdot 10^{-1} \text{ mol/kg H}_2\text{O}, I_m = 2.0 \text{ (NaClO}_4\text{)}$ |                        |                                  |                                    |                                       |
|-------------------------------------------------------------------------------------------------------------------------|------------------------|----------------------------------|------------------------------------|---------------------------------------|
| T [°C]                                                                                                                  | $\chi \text{ Cm}^{3+}$ | $\chi \text{ Cm(SO}_4\text{)}^+$ | $\chi \text{ Cm(SO}_4\text{)}_2^-$ | $\chi \text{ Cm(SO}_4\text{)}_3^{3-}$ |
| 25                                                                                                                      | 0.251                  | 0.505                            | 0.236                              | 0.002                                 |
| 50                                                                                                                      | 0.182                  | 0.407                            | 0.349                              | 0.054                                 |
| 75                                                                                                                      | 0.007                  | 0.436                            | 0.571                              | 0.038                                 |
| 100                                                                                                                     | 0.002                  | 0.207                            | 0.680                              | 0.131                                 |
| 120                                                                                                                     | 0.000                  | 0.151                            | 0.648                              | 0.207                                 |
| 140                                                                                                                     | 0.000                  | 0.014                            | 0.575                              | 0.466                                 |
| 160                                                                                                                     | 0.000                  | 0.004                            | 0.456                              | 0.565                                 |
| 180                                                                                                                     | 0.009                  | 0.008                            | 0.154                              | 0.830                                 |
| 200                                                                                                                     | 0.000                  | 0.013                            | 0.078                              | 0.909                                 |

### 3.2 Samples at constant sulphate concentration

#### 3.2.1 $[\text{SO}_4^{2-}]_{\text{total}} = 0.05 \text{ mol/kg H}_2\text{O}$

| $I_m = 0.60 \text{ (NaClO}_4\text{)}, [\text{SO}_4^{2-}]_{\text{total}} = 0.05 \text{ mol/kg H}_2\text{O}$ |                        |                                  |                                    |                                       |
|------------------------------------------------------------------------------------------------------------|------------------------|----------------------------------|------------------------------------|---------------------------------------|
| T [°C]                                                                                                     | $\chi \text{ Cm}^{3+}$ | $\chi \text{ Cm(SO}_4\text{)}^+$ | $\chi \text{ Cm(SO}_4\text{)}_2^-$ | $\chi \text{ Cm(SO}_4\text{)}_3^{3-}$ |
| 25                                                                                                         | 0.593                  | 0.313                            | 0.100                              | 0.000                                 |
| 50                                                                                                         | 0.458                  | 0.362                            | 0.132                              | 0.000                                 |
| 75                                                                                                         | 0.353                  | 0.439                            | 0.230                              | 0.000                                 |
| 100                                                                                                        | 0.206                  | 0.483                            | 0.304                              | 0.000                                 |
| 120                                                                                                        | 0.114                  | 0.584                            | 0.301                              | 0.000                                 |
| 140                                                                                                        | 0.058                  | 0.584                            | 0.332                              | 0.033                                 |
| 160                                                                                                        | 0.000                  | 0.584                            | 0.442                              | 0.033                                 |
| 180                                                                                                        | 0.000                  | 0.555                            | 0.442                              | 0.033                                 |
| 200                                                                                                        | 0.000                  | 0.500                            | 0.564                              | 0.000                                 |

| $I_m = 1.10 \text{ (NaClO}_4\text{)}, [\text{SO}_4^{2-}]_{\text{total}} = 0.05 \text{ mol/kg H}_2\text{O}$ |                        |                                  |                                    |                                       |
|------------------------------------------------------------------------------------------------------------|------------------------|----------------------------------|------------------------------------|---------------------------------------|
| T [°C]                                                                                                     | $\chi \text{ Cm}^{3+}$ | $\chi \text{ Cm(SO}_4\text{)}^+$ | $\chi \text{ Cm(SO}_4\text{)}_2^-$ | $\chi \text{ Cm(SO}_4\text{)}_3^{3-}$ |
| 25                                                                                                         | 0.734                  | 0.225                            | 0.048                              | 0.000                                 |
| 50                                                                                                         | 0.629                  | 0.287                            | 0.048                              | 0.000                                 |
| 75                                                                                                         | 0.461                  | 0.383                            | 0.161                              | 0.000                                 |
| 100                                                                                                        | 0.336                  | 0.463                            | 0.195                              | 0.000                                 |
| 120                                                                                                        | 0.211                  | 0.560                            | 0.195                              | 0.000                                 |
| 140                                                                                                        | 0.125                  | 0.560                            | 0.325                              | 0.000                                 |
| 160                                                                                                        | 0.125                  | 0.560                            | 0.325                              | 0.000                                 |
| 180                                                                                                        | 0.064                  | 0.560                            | 0.341                              | 0.052                                 |
| 200                                                                                                        | 0.000                  | 0.505                            | 0.499                              | 0.051                                 |

| $I_m = 2.09 \text{ (NaClO}_4\text{)}, [\text{SO}_4^{2-}]_{\text{total}} = 0.05 \text{ mol/kg H}_2\text{O}$ |                        |                                  |                                    |                                       |
|------------------------------------------------------------------------------------------------------------|------------------------|----------------------------------|------------------------------------|---------------------------------------|
| T [°C]                                                                                                     | $\chi \text{ Cm}^{3+}$ | $\chi \text{ Cm(SO}_4\text{)}^+$ | $\chi \text{ Cm(SO}_4\text{)}_2^-$ | $\chi \text{ Cm(SO}_4\text{)}_3^{3-}$ |
| 25                                                                                                         | 0.753                  | 0.171                            | 0.086                              | 0.000                                 |
| 50                                                                                                         | 0.680                  | 0.198                            | 0.086                              | 0.000                                 |
| 75                                                                                                         | 0.552                  | 0.302                            | 0.143                              | 0.000                                 |
| 100                                                                                                        | 0.425                  | 0.362                            | 0.189                              | 0.000                                 |
| 120                                                                                                        | 0.344                  | 0.434                            | 0.208                              | 0.000                                 |
| 140                                                                                                        | 0.201                  | 0.526                            | 0.262                              | 0.000                                 |
| 160                                                                                                        | 0.171                  | 0.526                            | 0.317                              | 0.000                                 |
| 180                                                                                                        | 0.137                  | 0.526                            | 0.317                              | 0.000                                 |
| 200                                                                                                        | 0.088                  | 0.552                            | 0.317                              | 0.080                                 |

| $I_m = 3.11 \text{ (NaClO}_4\text{)}, [\text{SO}_4^{2-}]_{\text{total}} = 0.05 \text{ mol/kg H}_2\text{O}$ |                        |                                  |                                    |                                       |
|------------------------------------------------------------------------------------------------------------|------------------------|----------------------------------|------------------------------------|---------------------------------------|
| T [°C]                                                                                                     | $\chi \text{ Cm}^{3+}$ | $\chi \text{ Cm(SO}_4\text{)}^+$ | $\chi \text{ Cm(SO}_4\text{)}_2^-$ | $\chi \text{ Cm(SO}_4\text{)}_3^{3-}$ |
| 25                                                                                                         | 0.782                  | 0.238                            | 0.000                              | 0.000                                 |
| 50                                                                                                         | 0.670                  | 0.289                            | 0.000                              | 0.000                                 |
| 75                                                                                                         | 0.464                  | 0.459                            | 0.100                              | 0.000                                 |
| 100                                                                                                        | 0.321                  | 0.558                            | 0.110                              | 0.000                                 |
| 120                                                                                                        | 0.234                  | 0.631                            | 0.132                              | 0.000                                 |
| 140                                                                                                        | 0.087                  | 0.663                            | 0.264                              | 0.000                                 |
| 160                                                                                                        | 0.087                  | 0.663                            | 0.264                              | 0.000                                 |
| 180                                                                                                        | 0.070                  | 0.663                            | 0.267                              | 0.000                                 |
| 200                                                                                                        | 0.009                  | 0.678                            | 0.308                              | 0.030                                 |

| $I_m = 4.11$ (NaClO <sub>4</sub> ), [SO <sub>4</sub> <sup>2-</sup> ] <sub>total</sub> = 0.05 mol/kg H <sub>2</sub> O |                         |                                          |                                                       |                                                        |
|----------------------------------------------------------------------------------------------------------------------|-------------------------|------------------------------------------|-------------------------------------------------------|--------------------------------------------------------|
| T [°C]                                                                                                               | $\chi$ Cm <sup>3+</sup> | $\chi$ Cm(SO <sub>4</sub> ) <sup>+</sup> | $\chi$ Cm(SO <sub>4</sub> ) <sub>2</sub> <sup>-</sup> | $\chi$ Cm(SO <sub>4</sub> ) <sub>3</sub> <sup>3-</sup> |
| 25                                                                                                                   | 0.753                   | 0.183                                    | 0.032                                                 | 0.000                                                  |
| 50                                                                                                                   | 0.682                   | 0.238                                    | 0.028                                                 | 0.000                                                  |
| 75                                                                                                                   | 0.552                   | 0.379                                    | 0.081                                                 | 0.000                                                  |
| 100                                                                                                                  | 0.420                   | 0.471                                    | 0.105                                                 | 0.000                                                  |
| 120                                                                                                                  | 0.338                   | 0.520                                    | 0.134                                                 | 0.000                                                  |
| 140                                                                                                                  | 0.260                   | 0.540                                    | 0.250                                                 | 0.000                                                  |
| 160                                                                                                                  | 0.173                   | 0.645                                    | 0.194                                                 | 0.000                                                  |
| 180                                                                                                                  | 0.125                   | 0.653                                    | 0.212                                                 | 0.000                                                  |
| 200                                                                                                                  | 0.060                   | 0.626                                    | 0.331                                                 | 0.000                                                  |

### 3.2.2 [SO<sub>4</sub><sup>2-</sup>]<sub>total</sub> = 0.20 mol/kg H<sub>2</sub>O

| $I_m = 1.01$ (NaClO <sub>4</sub> ), [SO <sub>4</sub> <sup>2-</sup> ] <sub>total</sub> = 0.20 mol/kg H <sub>2</sub> O |                         |                                          |                                                       |                                                        |
|----------------------------------------------------------------------------------------------------------------------|-------------------------|------------------------------------------|-------------------------------------------------------|--------------------------------------------------------|
| T [°C]                                                                                                               | $\chi$ Cm <sup>3+</sup> | $\chi$ Cm(SO <sub>4</sub> ) <sup>+</sup> | $\chi$ Cm(SO <sub>4</sub> ) <sub>2</sub> <sup>-</sup> | $\chi$ Cm(SO <sub>4</sub> ) <sub>3</sub> <sup>3-</sup> |
| 25                                                                                                                   | 0.370                   | 0.479                                    | 0.157                                                 | 0.001                                                  |
| 50                                                                                                                   | 0.237                   | 0.427                                    | 0.276                                                 | 0.038                                                  |
| 75                                                                                                                   | 0.042                   | 0.523                                    | 0.461                                                 | 0.019                                                  |
| 100                                                                                                                  | 0.011                   | 0.321                                    | 0.614                                                 | 0.070                                                  |
| 120                                                                                                                  | 0.006                   | 0.233                                    | 0.670                                                 | 0.098                                                  |
| 140                                                                                                                  | 0.006                   | 0.111                                    | 0.664                                                 | 0.287                                                  |
| 160                                                                                                                  | 0.006                   | 0.056                                    | 0.537                                                 | 0.462                                                  |
| 180                                                                                                                  | 0.006                   | 0.028                                    | 0.297                                                 | 0.678                                                  |
| 200                                                                                                                  | 0.006                   | 0.007                                    | 0.228                                                 | 0.786                                                  |

| $I_m = 2.04$ (NaClO <sub>4</sub> ), [SO <sub>4</sub> <sup>2-</sup> ] <sub>total</sub> = 0.20 mol/kg H <sub>2</sub> O |                         |                                          |                                                       |                                                        |
|----------------------------------------------------------------------------------------------------------------------|-------------------------|------------------------------------------|-------------------------------------------------------|--------------------------------------------------------|
| T [°C]                                                                                                               | $\chi$ Cm <sup>3+</sup> | $\chi$ Cm(SO <sub>4</sub> ) <sup>+</sup> | $\chi$ Cm(SO <sub>4</sub> ) <sub>2</sub> <sup>-</sup> | $\chi$ Cm(SO <sub>4</sub> ) <sub>3</sub> <sup>3-</sup> |
| 25                                                                                                                   | 0.359                   | 0.437                                    | 0.194                                                 | 0.002                                                  |
| 50                                                                                                                   | 0.213                   | 0.442                                    | 0.241                                                 | 0.054                                                  |
| 75                                                                                                                   | 0.012                   | 0.534                                    | 0.451                                                 | 0.032                                                  |
| 100                                                                                                                  | 0.002                   | 0.287                                    | 0.588                                                 | 0.118                                                  |
| 120                                                                                                                  | 0.000                   | 0.218                                    | 0.623                                                 | 0.151                                                  |
| 140                                                                                                                  | 0.000                   | 0.029                                    | 0.657                                                 | 0.348                                                  |
| 160                                                                                                                  | 0.000                   | 0.056                                    | 0.542                                                 | 0.422                                                  |
| 180                                                                                                                  | 0.000                   | 0.016                                    | 0.256                                                 | 0.715                                                  |
| 200                                                                                                                  | 0.000                   | 0.013                                    | 0.175                                                 | 0.815                                                  |

| $I_m = 3.16$ (NaClO <sub>4</sub> ), [SO <sub>4</sub> <sup>2-</sup> ] <sub>total</sub> = 0.20 mol/kg H <sub>2</sub> O |                         |                                          |                                                       |                                                        |
|----------------------------------------------------------------------------------------------------------------------|-------------------------|------------------------------------------|-------------------------------------------------------|--------------------------------------------------------|
| T [°C]                                                                                                               | $\chi$ Cm <sup>3+</sup> | $\chi$ Cm(SO <sub>4</sub> ) <sup>+</sup> | $\chi$ Cm(SO <sub>4</sub> ) <sub>2</sub> <sup>-</sup> | $\chi$ Cm(SO <sub>4</sub> ) <sub>3</sub> <sup>3-</sup> |
| 25                                                                                                                   | 0.370                   | 0.479                                    | 0.157                                                 | 0.001                                                  |
| 50                                                                                                                   | 0.237                   | 0.405                                    | 0.320                                                 | 0.038                                                  |
| 75                                                                                                                   | 0.024                   | 0.510                                    | 0.508                                                 | 0.019                                                  |
| 100                                                                                                                  | 0.011                   | 0.246                                    | 0.711                                                 | 0.068                                                  |
| 120                                                                                                                  | 0.006                   | 0.180                                    | 0.704                                                 | 0.141                                                  |
| 140                                                                                                                  | 0.006                   | 0.057                                    | 0.578                                                 | 0.419                                                  |
| 160                                                                                                                  | 0.006                   | 0.028                                    | 0.537                                                 | 0.508                                                  |
| 180                                                                                                                  | 0.006                   | 0.028                                    | 0.230                                                 | 0.770                                                  |
| 200                                                                                                                  | 0.006                   | 0.007                                    | 0.142                                                 | 0.885                                                  |

| $I_m = 4.05 \text{ (NaClO}_4\text{)}, [\text{SO}_4^{2-}]_{\text{total}} = 0.20 \text{ mol/kg H}_2\text{O}$ |                        |                                  |                                    |                                       |
|------------------------------------------------------------------------------------------------------------|------------------------|----------------------------------|------------------------------------|---------------------------------------|
| T [°C]                                                                                                     | $\chi \text{ Cm}^{3+}$ | $\chi \text{ Cm(SO}_4\text{)}^+$ | $\chi \text{ Cm(SO}_4\text{)}_2^-$ | $\chi \text{ Cm(SO}_4\text{)}_3^{3-}$ |
| 25                                                                                                         | 0.404                  | 0.428                            | 0.209                              | 0.001                                 |
| 50                                                                                                         | 0.234                  | 0.388                            | 0.320                              | 0.038                                 |
| 75                                                                                                         | 0.024                  | 0.460                            | 0.550                              | 0.019                                 |
| 100                                                                                                        | 0.011                  | 0.201                            | 0.711                              | 0.107                                 |
| 120                                                                                                        | 0.006                  | 0.150                            | 0.685                              | 0.163                                 |
| 140                                                                                                        | 0.006                  | 0.034                            | 0.438                              | 0.594                                 |
| 160                                                                                                        | 0.006                  | 0.014                            | 0.367                              | 0.646                                 |
| 180                                                                                                        | 0.006                  | 0.028                            | 0.159                              | 0.809                                 |
| 200                                                                                                        | 0.006                  | 0.007                            | 0.093                              | 0.903                                 |

**4.  $\Delta\varepsilon_n$  values for the stepwise formation of the  $[\text{Cm}(\text{SO}_4)_n]^{3-2n}$  complexes (n = 1, 2, 3)**

| T [°C] | $\Delta\varepsilon_1$ | $\Delta\varepsilon_2$ | $\Delta\varepsilon_3$ |
|--------|-----------------------|-----------------------|-----------------------|
| 25     | $-0.15 \pm 0.04$      | $-0.10 \pm 0.06$      | -                     |
| 50     | $-0.15 \pm 0.04$      | $-0.04 \pm 0.07$      | -                     |
| 75     | $-0.18 \pm 0.05$      | $0.04 \pm 0.05$       | -                     |
| 100    | $-0.17 \pm 0.07$      | $0.06 \pm 0.04$       | -                     |
| 120    | $-0.12 \pm 0.06$      | $0.04 \pm 0.06$       | $-0.11 \pm 0.08$      |
| 140    | $-0.11 \pm 0.09$      | $0.00 \pm 0.04$       | $-0.26 \pm 0.04$      |
| 160    | $-0.21 \pm 0.10$      | $0.06 \pm 0.05$       | $-0.14 \pm 0.03$      |
| 180    | $-0.17 \pm 0.12$      | $0.07 \pm 0.03$       | $-0.20 \pm 0.05$      |
| 200    | $-0.27 \pm 0.11$      | $0.08 \pm 0.02$       | $-0.24 \pm 0.08$      |



## 5. Cm(III) lifetime values

### 5.1 Molar fractions of the studied samples

| 1.03 m NaNO <sub>3</sub> | Cm <sup>3+</sup> | CmNO <sub>3</sub> <sup>2+</sup> | Cm(NO <sub>3</sub> ) <sub>2</sub> <sup>+</sup> |
|--------------------------|------------------|---------------------------------|------------------------------------------------|
| 25°C                     | 0.331            | 0.662                           | 0.017                                          |
| 100°C                    | 0.220            | 0.583                           | 0.204                                          |
| 160°C                    | 0.016            | 0.636                           | 0.373                                          |
| 200°C                    | 0.000            | 0.644                           | 0.567                                          |

| 0.03 m Na <sub>2</sub> SO <sub>4</sub> | Cm <sup>3+</sup> | CmSO <sub>4</sub> <sup>+</sup> | Cm(SO <sub>4</sub> ) <sub>2</sub> <sup>-</sup> | Cm(SO <sub>4</sub> ) <sub>3</sub> <sup>3-</sup> |
|----------------------------------------|------------------|--------------------------------|------------------------------------------------|-------------------------------------------------|
| 25°C                                   | 0.826            | 0.186                          | 0.018                                          | 0.002                                           |
| 100°C                                  | 0.561            | 0.327                          | 0.094                                          | 0.016                                           |
| 160°C                                  | 0.268            | 0.541                          | 0.173                                          | 0.016                                           |
| 200°C                                  | 0.225            | 0.509                          | 0.188                                          | 0.044                                           |

| 0.20 m Na <sub>2</sub> SO <sub>4</sub> | Cm <sup>3+</sup> | CmSO <sub>4</sub> <sup>+</sup> | Cm(SO <sub>4</sub> ) <sub>2</sub> <sup>-</sup> | Cm(SO <sub>4</sub> ) <sub>3</sub> <sup>3-</sup> |
|----------------------------------------|------------------|--------------------------------|------------------------------------------------|-------------------------------------------------|
| 25°C                                   | 0.334            | 0.528                          | 0.157                                          | 0.001                                           |
| 100°C                                  | 0.011            | 0.201                          | 0.711                                          | 0.107                                           |
| 160°C                                  | 0.006            | 0.014                          | 0.435                                          | 0.587                                           |
| 200°C                                  | 0.006            | 0.007                          | 0.093                                          | 0.903                                           |

### 5.2 Experimental determined lifetimes of the samples given in 5.1

| T   | No ligands | [NO <sub>3</sub> <sup>-</sup> ] <sub>total</sub> = 1.03m | [SO <sub>4</sub> <sup>2-</sup> ] <sub>total</sub> = 0.03 m | [SO <sub>4</sub> <sup>2-</sup> ] <sub>total</sub> = 0.20 m |
|-----|------------|----------------------------------------------------------|------------------------------------------------------------|------------------------------------------------------------|
| 25  | 68 ± 5 μs  | 83 ± 5 μs                                                | 74 ± 5 μs                                                  | 84 ± 5 μs                                                  |
| 100 | 66 ± 5 μs  | 77 ± 5 μs                                                | 65 ± 5 μs                                                  | 82 ± 5 μs                                                  |
| 160 | 52 ± 5 μs  | 64 ± 5 μs                                                | 59 ± 5 μs                                                  | 79 ± 5 μs                                                  |
| 200 | 36 ± 5 μs  | 10 ± 5 μs                                                | 55 ± 5 μs                                                  | 85 ± 5 μs                                                  |

## 6. References

- 1 Xiang T., Johnston, K.P., *Spectroscopic measurement of pH in aqueous sulfuric acid and ammonia from sub- to supercritical conditions*, Ind. Eng. Chem. Res., **35**, 4788-4795, (1996).
- 2 D.A. Palmer, R. Fernandez-Prini, A.H. Harvey, *Ionization Equilibria of Acids and Bases*. In *Aqueous Systems at Elevated Temperatures and Pressures*; Elsevier Science Publishers B.V.: Amsterdam, (2004).
- 3 Dickson, A.G., Wesolowski, D.J., Palmer, D.A., Mesmer, R.E, *Dissociation constant of bisulfate ion in aqueous sodium chloride solutions to 250°C*, J. Phys. Chem., **94**, 7978-7985, (1990).
- 4 R. Guillaumont, Th. Fanghänel, J. Fuger, I. Grenthe, V. Neck, D.A. Palmer, M.H. Rand (OECD, NEA-TDB). *Chemical Thermodynamics Vol. 5. Update on the Chemical Thermodynamics of Uranium, Neptunium, Plutonium, Americium and Technetium*. Elsevier Science Publishers B.V.: Amsterdam, 2003.
